# Supplementary material for: Mitochondrial Reactive Oxygen Species Modulate Mosquito Susceptibility to Plasmodium Infection
Source: PubMed Central journal article supplement (PMC3399787; doi:10.1371/journal.pone.0041083), 2012-07-18
Supplement: pone.0041083.s001.pdf [file pone.0041083.s001.pdf]

CLUSTAL W (1.83) multiple sequence alignment

```
AgMC1 -----MARSVGS-- 7
AeMC1 -----MTAESGSR 9
DmMC1 -----MATREACGQFAAASAAMAA 19
HsSLC25A40 -----
HsSLC25A39 -----
ScMTM1 -----
AgANT -----
AeANT -----
DmANT -----MGN 3
HsANT -----
ScANT -----MSS 3
AgUCP5 -----
AeUCP -----
DmUCP -----
HsUCP5 -----MGIFPGIILIFLRVKFATAA 20
AgPiC MFAGLLDAARNSPFRTPFTRVHCDDGTEKAVVPGRSVQAAASRECDAGTVAPVGRSIAA 60
AePiC MFSALLDAARNSPFKTPFKAQCD-----AAAPSENPKSLIA--SGRTLAA 44
DmPiC MFSSFFETARNSPFRTPMARCD-----AAAPVVEPQ----PVEGRQIAA 42
HsPiC MFSSVAHLARANPFNTPHLQLVHDG-----LGDLRSSSPGPTGQPRRPRNLAA 48
ScPiC1 -----MESNKQP----- 7

AgMC1 -SVAVAPGEDMDSRFIRIPYQIILSSCSGALVTSLFMTPLDVVKTRLQAQQKVLISN-- 64
AeMC1 ESPLPAPGVDMDSDRFIRIPYQIILSSCSGALVTSLFMTPLDVVKTRLQTQQKMLLSN-- 67
DmMC1 ASSQNPSKATMTDFRFRIRPLQOVASACTGAMVTACFMTPLDVVKTRLQAQQALLSN-- 77
HsSLC25A40 -----MDPETRGQEIIVKVTPLQQLASCTGAILTSVIVTPLDVVKIRLQAQNNPLP---- 51
HsSLC25A39 -----MADQDPAGISPLQQMVASGTGAVVTSLFMTPLDVVKVRLQSQRPSMASELM 51
ScMTM1 -----MSDRNTSNSLTLKERMLSAGAGSVLTSLILTPMDVVIRLQQQQMIPDCSD 52
AgANT -----MT-KKADPYGFAKDFLAGGISAAVSKTAVAPIERVKLLQVQ-AASKQIA- 48
AeANT -----MSGKKADPYGFAKDFLAGGISAAVSKTAVAPIERVKLLQVQ-AASKQIA- 49
DmANT -----ISASITSQSKMGKDFDVAAGVFAAGGISAAVSKTAVAPIERVKLLQVQ-HISKQIS- 61
HsANT -----MGDHAWSFLLKDFLAGGVAAVSKTAVAPIERVKLLQVQ-HASKQIS- 46
ScANT -----NAQVKTPLPPAPKESNFLIDFLMGVSAAVAKTAASPIERVKLLIQNQDEMIKQGT- 62
AgUCP5 -----MSDIR--DWRPFVYGGMASIMAEFGTFPIDTTKTRLQIQGKTDTRSH- 45
AeUCP -----MGEIR--DWRPFVYGGVASITAEFGTFPIDTTKTRLQIQGKIDQSF- 45
DmUCP -----MGEVK--DWRPFVYGGVASITAEFGTFPIDTTKTRLQIQGKIDQSF- 45
HsUCP5 -----VIVSGHQKSTTVSHEMGLNWKPFVYGGGLASIVAEFGTFVVDLTKTRLQIQGQSIDARF- 79
AgPiC -----AAT-----DEVEFGSTKFFLLCGLGGIISCGSTHTFVPLDLVKCRLQVD----- 105
AePiC -----AAS-----DEVEFGSTQFYLLCGVGGIISCGSTHTFVPLDLVKCRLQVD----- 89
DmPiC -----AATPVANQDSCEFGSTKYFALCGIGLISCGTHTFVPLDLVKCRLQVD----- 93
HsPiC -----AAVEEQ---YSCDYGSGRFFILCGLGGIISCGTHTALVPLDLVKCRMQVD----- 96
ScPiC1 -----RKIQLYTKEFYATCTLGGI IACGPTHSSITPLDLVKCRLQVN----- 49
      . . . : *:: : :* :

AgMC -----KCYLYCNG---LMDHICPCGPNPMPASTISKRPLHLTGTDIFAFTKI 108
AeMC1 -----KCYLYCNG---LMDHLCPCGPNG---TAFAPKPLHFTGTIDAFVKI 107
DmMC1 -----KCFLYCNG---LMDHICPCGPDTPN--PAAAKPAPRFSGTIDAFIKI 119
HsSLC25A40 -----KGKCFVYSNG---LMDHLCVCEEGG---NKLWYKKPNFGQTLDAFFKI 94
HsSLC25A39 -----PSSRLWLSYTKWKCLLYCNG---VLEPLYLCPNGAR--CATWFQDPTRFTGTMDAFVKI 106
ScMTM1 -----GAAEVPNAVSSGSKMKTFTNVGGQNLNNAKIFWESACFQELHCKNSSLKFNGTLEAFTKI 112
AgANT -----VDQYKGI VDCFVRI 63
AeANT -----ADKQYKGI VDCFVRI 64
DmANT -----PDKQYKGMVDCFIRI 76
HsANT -----AEKQYKGI IDCVVRI 61
ScANT -----LDKKYSGI VDCFKRT 77
AgUCP5 -----SELRYRGM TDAFVKI 60
AeUCP -----AELKYRGM TDAFVKI 60
DmUCP -----SQLRYRGM TDAFVKI 60
HsUCP5 -----KEIKYRGM FHALFRI 94
AgPiC -----QAKYKNV FHGFKLT 119
AePiC -----QAKYKNL FHGFKVS 103
DmPiC -----QAKYKNL VHGFKVT 107
HsPiC -----PKQYKGI FNGFSVT 110
ScPiC1 -----PKLYTSNLQGFVKI 63
      . . .

AgMC1 SRYEGVPSLWSGLGPTLLIALPTTVIYFVAYEQFRIRLKELYQRRKGRD-----AEL 160
AeMC1 SHHEGVKSLWSGLSPTLVLALPTTVIYFVAYEQFRLRLKEFYLRKRDKS-----AEL 159
DmMC1 SRTEGIGSLWSGLSPTLLISALPSTIIYFVAYEQFKARFTDIHYKYTRRPDTTIAHDIPPHI 179
```

HsSLC25A40 IRNEGIKSLWSGLPPTLVMAVPATVIYFTCYDQLSALLRSKLGEN----- 139  
HsSLC25A39 VRHEGTRTLWSGLPATLVMTVPATAIYFTAYDQLKAFLCGRALTS----- 151  
ScMTM1 ASVEGITSLWRGISTLLMAIPANMVYFSGYEYIRDVSPFIASSTYP----- 157  
AgANT PKEQGIGAFWRGNLANVIRYFPTQALNF-AFKDVYKQVFLGGVDKNTQF-----WR 113  
AeANT PKEQGFAGAFWRGNLANVIRYFPTQALNF-AFKDVYKQIFLGGVDKNTQF-----WR 114  
DmANT PKEQGFSSFWRGNLANVIRYFPTQALNF-AFKDKYKQVFLGGVDKNTQF-----WR 126  
HsANT PKEQGFSLFWRGNLANVIRYFPTQALNF-AFKDKYKQLFLGGVDRHKQF-----WR 111  
ScANT AKQEGELISFWRGNTANVIRYFPTQALNF-AFKDKIKLMF--GFKKEEGY-----GK 125  
AgUCP5 SRQEGVKALYSGIWPAVLRQATYGTIKFQGTYYTLKKVATDRGLLHDKAG-----NE 111  
AeUCP SKQEGMKALYSGIWPAVLRQATYGTIKFQGTYYTLKKVAIEKQWLVDKSG-----NE 111  
DmUCP SREEGLRALYSGIWPAVLRQATYGTIKFQGTYYTLKKLANERGLLINEDG-----SE 111  
HsUCP5 CKEEGVLALYSGIAPALLRQASYGTIKIGIYQSLKRLFVER--LED-----E 139  
AgPiC LAEDGSRGLVKGWAPTFFGYSAQGAFFKFLYEVFVKVQYANMLGEENAYL-----Y 169  
AePiC VAEEGAKGLVKGWAPTFFGYSAQGAFFKFLYEVFVKVQYANMLGEENAYL-----Y 153  
DmPiC VAEEGARGLAKGWPTLLGYSAQGLCKFGLYELFKVYAEIIGEENAYL-----Y 157  
HsPiC LKEDGVRGLAKGWAPTFLGYSMQGLCKFGFYEVFKVLYSNMLGEENTYL-----W 160  
ScPiC1 IANEGWKKVYTGFGATFVGYSLQAGKYGGYEFKHLYSWLSPPG----- 108  
: \* . \* .. :

AgMC1 PIWLPLLAGSSARVLAVTIVNPLELIRTKMQSEK-----LSYREVGOAFRSMLRVQ 211  
AeMC1 PFWLPLVAGSARVMAVTIVNPLELIRTKMQSEK-----LSYTEVGRGFRSMLKMQ 210  
DmMC1 PFLVPLLAVGSGRILAVTCVSPVLELIRTKMQSOR-----MTHAEMFGTIRQVVQSQ 230  
HsSLC25A40 ETCIPIVAGIVARFGAVTVISPLELIRTKMQSKK-----FSYVELHRFVSKKVSSED 190  
HsSLC25A39 DLYAPMVAGALARLGTVTVI SPLELMRKLQAQH-----VSYRELGACVRTAVAQ 202  
ScMTM1 -TLNPLFCGAIARVFAATS IAPLELVKTKLQSI PRSSKSTKTMMVKDLLNETROEMKMV 216  
AgANT YFLGNLGSGBAAGATSLCFVYPLDFARTRLGADVG---RGAGEREFNGLLDCLKKTVKSD 170  
AeANT YFMGNLGSGBAAGATSLCFVYPLDFARTRLGADVG---RAGAEREYNGLIDCLKKTVKSD 171  
DmANT YFAGNLASGBAAGATSLCFVYPLDFARTRLAADTG---KGG-QREFTGLGNCLTKIFKSD 182  
HsANT YFAGNLASGBAAGATSLCFVYPLDFARTRLAADVG---KGAQREFHGLGDCI IKIFKSD 168  
ScANT WFAGNLASGBAAGALSLFVYSLDYARTRLAADSKSS--KGGARQFNGLIDVYKTKLSD 184  
AgUCP5 SLWCNAACATMAGAISSAIANPTDVLKVRMQRVHGR-----GTSDVGLVQCFREIYVHE 164  
AeUCP NVWCNAGCATIAGAVSSAIANPTDVLKVRMQRVHGR-----GTNNAGLARC FKEIYVHE 164  
DmUCP RVWSNILCAAAGAISSAIANPTDVLKVRMQRVHGR-----GQ-HKGLLGCFGEIYKYE 163  
HsUCP5 TLLINMICGVVSGVISSTIANPTDVLKIRMQAQG-----SLFQGS MIGSFIDIYQQE 191  
AgPiC RTWLYLGASASAEFFADALSPFEAAKVKIQ-TMPG-----FASNREAMPKMMGEE 220  
AePiC RTWLYLAASASAEFFADIALSPMEAAKVKIQ-TMPG-----FAGTLREAMPKMMGEE 204  
DmPiC RTSLYLAASASAEFFADIALAPFEAAKVKIQ-TMPG-----YANNFREAVPKMLKEE 208  
HsPiC RTSLYLAASASAEFFADIALAPMEAAKVKIQ-TMPG-----YANTLRDAAPKMYKEE 211  
ScPiC1 -VTVYLMASATAEFLADIMLCPFEAIVKQQTMP-----FCNNVVDGWKKMYAES 159  
.. . : . : :

AgMC1 G-ILGLWKGFPTILRDVPFSGIYWTYEFKFKHFN-----VSQPTFAFSFAGG 259  
AeMC1 G-IMGLWKGFPTILRDVPFSGIYWTYEFKFKRCN-----VTQPTFGVSVFVGG 258  
DmMC1 G-VLGLWRGLPPTILRDVPFSGIYWTCEYLKSSFG-----VVEPTFSFSFAAG 278  
HsSLC25A40 G-WISLWRGWAPTFLRDVPFSGIYWTCEYLKSSFG-----LYEPTFMFINTSG 242  
HsSLC25A39 G-WRSLWLGWGPTALRDVPFSGIYWFNYELVKSWSLNGFRP-----KDQTSVGMFSVAG 254  
ScMTM1 GPSRALFKGLEITLWRDVPFSAIYWSSYELCKERLWLDSTRFA--SKDANWVHFINSFASG 275  
AgANT G-ILGLYRGFNVSQGI I IYRAAYFGCFDTAKGMLPD-----PKNTSIFVSWAIA 219  
AeANT G-LILGLYRGFNVSQGI I IYRAAYFGCFDTAKGMLPD-----PKNTSIFVSWAIA 220  
DmANT G-IVGLYRGFVSVQGI I IYRAAYFGFYDTARGMLPD-----PKNTP IYISWAIA 231  
HsANT G-LRGLYQGFNVSVQGI I IYRAAYFGFYDTAKGMLPD-----PKNVHIFVSWMIA 217  
ScANT G-VAGLYRGFVSVVGI IYVYRGLYFGMYDSLKPLLLTG-----SLEGSFLASFLLG 234  
AgUCP5 G-IRGLWRGVGPTAQRAAVIAAVELPVYDFCKLHLMET-----FGDQVANHFISS 213  
AeUCP G-VRGLWRGVGPTAQRAAVIAAVELPVYDFCKLHLMET-----FGDQVANHFISS 213  
DmUCP G-VRGLWRGVGPTAQRAAVIASVELPVYDFCKLQLMNA-----FGDHVGNHFISS 212  
HsUCP5 G-TRGLWRGVVPTAQRAAIVVGVLELVPYDITKHLILSG-----MMGDTILTHFVSS 242  
AgPiC G-IMAFYKGLVPLWCRQIPYTMKMFACFEKTVELLYAYVVPKPRDQCSKGEQLIVTFAAG 279  
AePiC G-ITAFYKGLVPLWCRQIPYTMKMFACFEKTVELLYAYVVPKPRDQCSKGEQLIVTFAAG 263  
DmPiC G-VNAFYKGLVPLWMRQIPYTMKMFACFEKTVELLYAYVVPKPRADCTKGEQLIVTFAAG 267  
HsPiC G-LKAFYKGVAPLWMRQIPYTMKMFACFEKTVELLYAYVVPKPRADCTKGEQLIVTFAAG 270  
ScPiC1 GGMKAFYKGI VPLWCRQIPYTMCKFTSFEKIVQKIYS-VLPKKKEEMNALQQISVSVFVGG 218  
\* . : : \* : :

AgMC1 AISGGVAAFFTVPFDDVVKTHQOIAFGEQFLYAQNGDSKA-----AG 300  
AeMC1 AISGGVAAFLTVPFDDVVKTHQOIEFGEKFLYAENGEK----- 295  
DmMC1 AISGSVAATITTPFDDVVKTHEQIEFGEKFI FSDNPPK----- 315  
HsSLC25A40 ALSGSFAAVATLPLFDDVVKTKQKQTLWT---YESHKISM----- 277  
HsSLC25A39 GISGTVAAVLTLFDDVVKTRQVVALGA---MEAVRVN----- 288  
ScMTM1 CISGMIAAICTHPFDVGKTRWQI SMMN---NSDPKG----- 308  
AgANT QVVTASGII SYPFDTVRRRMMMQSGRA----- 247  
AeANT QVVTASGIVSYPFDTVRRRMMMQSGRA----- 248  
DmANT QVVTVAGIVSYPFDTVRRRMMMQSGRK----- 259  
HsANT QSVTAVAGLVSYPFDTVRRRMMMQSGRK----- 245

ScANT WVVTGASTCSYPLDTRRRMMTSG----- 260  
 AgUCP5 FIASLGSIASTPIDVIRTRLMNQRRVHQLQPSITP-----AATTTTT 256  
 AeUCP FIASLGSIAVASTPIDVIRTRLMNQRRVQLQVHNLGPGGGGGGGRGVAGGGGLAAVANPS 273  
 DmUCP FIASLGSIASTPIDVIRTRLMNQRPVSI TMN-----GVVTAAA 251  
 HsUCP5 FTCLAGALASNPVDVVRTRMMNQRAIVGHVD----- 274  
 AgPiC YIAGVFCAIVSHPADVVVSKLNQAKGS----- 306  
 AePiC YIAGVFCAIVSHPADVVVSKLNQAKGS----- 290  
 DmPiC YIAGVFCAVVSHPADVVVSKLNQAKGA----- 294  
 HsPiC YIAGVFCAIVSHPADSVVSVLNKEKGS----- 297  
 ScPiC1 YLAGILCAAVSHPADVMVSKINSERKAN----- 246

. : \* \*

AgMC1 PKKPVRSIGTFETMGRIFQMNGIRGLFAGLTPRLVKVAPACAIMIASFEYGKNFFRYRNV 360  
 AeMC1 -KKPQKSSGTFETMRNIYVRNGIKGLFAGLTPRLVKVAPACAIMIASFEYGKNFFRYRNV 354  
 DmMC1 ---QVATKSVAMRLAS IYRMGGVPAIFSGLGPRLFKVAPACAIMISSFEYGKSFYHYNI 372  
 HsSLC25A40 ---PLHMS-TWII MKNIVAKNGFSGLFSGLIPRLIKIAPACAIMISTYEFGKSAFFQKQNV 333  
 HsSLC25A39 ---PLHVDSTWLLRRIRAESGTFKGLFAGFLPRI IKAAPSCAIMISTYEFGKSAFFQRLNQ 345  
 ScMTM1 ---GNRSRNMFKFLETIWRTEGLAALYTGLAARVIKIAPSCAIMISSYEISKKVFGNKLH 365  
 AgANT -KSEVMYKNTLDCWVKIAKQEGSGAFFKGAFSNVLR-GTGGALVLFYDEVKALLG---- 301  
 AeANT -KSEIMYKNTLDCWVKIGKTEGSAFFKGAFSNVLR-GTGGALVLFYDEVKALMG---- 302  
 DmANT -ATEVIYKNTLHCWATIAKQEGTGAFKGAFSNLR-GTGGAFVLFVLYDEIKKVL---- 312  
 HsANT -GADIMYTGTVDCWRKIAKDEGAKAFFKGAWSNVLR-GMGGAFVLFVLYDEIKKYV---- 298  
 ScANT --QAVKYDGAFDCLRKIVA AEGVGS LFKCGGANILR-GVAGAGVISMYDQLQMLFGKKF 317  
 AgUCP5 TTPRLYYTGSDCAVQTVRNEGFALYKGFIP TWVRMGPNNI IFFITYEQLKQFY----- 311  
 AeUCP SPSAKIYTGSLDCAIQTVRNEGFALYKGFIP TWVRMGPNNI IFFITYEQLKQMY----- 328  
 DmUCP TP--KLYSGSLDCAVQTVRNEGLPALYKGFIP TWVRMGPNNI IFFITYEQLKKY----- 303  
 HsUCP5 -----LYKGTVDGILKMWKHEGFALYKGFWPNWLR LGPWNI IFFITYEQLKRLQI---- 325  
 AgPiC -----SAIDVAKQLGFMGMWNLMPRI IIMIGTLTALQWFI YDGVKVALSIPRP 354  
 AePiC -----SAFDVAKQLGFMGMWNLMPRI IIMIGTLTALQWFI YDGVKVALNIPRP 338  
 DmPiC -----SAISVAKSLGFSGMWNLTPRI IIMIGTLTALQWFI YDGVKVALGIPRP 342  
 HsPiC -----SASLVLRKLGFGKGVWKG L FAR IIMIGTLTALQWFI YDSVKVYFRLPRP 345  
 ScPiC1 -----ESMSVASKRIYQKIGFTGLWNLMPRIVMIGTLTSLFQWLI YDSF----- 290

\* ..: \* . . ::

AgMC1 QRYQERKDRVASGSDGSVSSSSSTS--- 387  
 AeMC1 TRYQARWE-----KDQGALIKTKKHTGVGY 379  
 DmMC1 DQHNRSNQ---ATKGP GS----- 387  
 HsSLC25A40 RRQQY----- 338  
 HsSLC25A39 DRLLGG----- 351  
 ScMTM1 Q----- 366  
 AgANT -----  
 AeANT -----  
 DmANT -----  
 HsANT -----  
 ScANT K----- 318  
 AgUCP5 -----  
 AeUCP -----  
 DmUCP -----  
 HsUCP5 -----  
 AgPiC PPEMPESLKKKLG VQ----- 370  
 AePiC PPEMPESLKKKLG VQ----- 354  
 DmPiC PPEMPASL KAKQH----- 356  
 HsPiC PPEMPESLKKKLG L TQ----- 362  
 ScPiC1 -----
