# Supplementary material for: Mitochondrial Reactive Oxygen Species Modulate Mosquito Susceptibility to Plasmodium Infection
Source: PubMed Central journal article supplement (PMC3399787; doi:10.1371/journal.pone.0041083), 2012-07-18
Supplement: pone.0041083.s005.pdf [file pone.0041083.s005.pdf]

| <b>Gene Name</b> | <b>Accession No.</b> | <b>Identity</b> | <b>Homology</b> |
|------------------|----------------------|-----------------|-----------------|
| AeMC1            | AAEL001329           | 79%             | 87%             |
| AeMC1            | AAEL001329           | 79%             | 87%             |
| DmMC1            | NP_001027071         | 57%             | 72%             |
| DmMC1            | NP_001027071         | 57%             | 72%             |
| HsSLC25A40       | NP_061331.2          | 47%             | 64%             |
| HsSLC25A39       | NP_057100            | 44%             | 60%             |
| ScMTM1           | EDN61842             | 34%             | 48%             |
| DmUCP            | CG7314-RB            | 25%             | 41%             |
| DmANT            | CG16944              | 24%             | 44%             |
| AeUCP            | AAEL011842           | 24%             | 39%             |
| AgUCP5           | AGAP011839-PA        | 24%             | 38%             |
| ScPiC1           | NP_010973            | 24%             | 38%             |
| HsPiC            | NP_005879            | 23%             | 45%             |
| ScANT            | AAA97484             | 23%             | 45%             |
| AePiC            | AAEL011184           | 23%             | 43%             |
| HsUCP5           | NP_003942            | 23%             | 41%             |
| AgPiC            | AGAP003586-PA        | 23%             | 37%             |
| HsANT            | NP_001142            | 22%             | 42%             |
| AgANT            | AGAP006782-PA        | 21%             | 43%             |
| DmPiC            | CG4994-PA            | 21%             | 35%             |
| AeANT            | AAEL004855           | 20%             | 43%             |
